# Supplementary material for: Surface Water Dynamics from Space: A Round Robin Intercomparison of Using Optical and SAR High-Resolution Satellite Observations for Regional Surface Water Detection
Source: MDPI journal article supplement (doi:10.3390/rs14102410), 2022-05-17
Supplement: s1 [file s1]

## Supplementary Material

**Table S1.** Classification accuracies (%) for each of the five round robin test sites. OA = Overall Accuracy; UA = User's Accuracy, and PA = Producers Accuracy.

|            | Mandatory sites |    |    |        |    |     |        |     |    |                              |     |    | Optional sites |     |    |             |     |    |
|------------|-----------------|----|----|--------|----|-----|--------|-----|----|------------------------------|-----|----|----------------|-----|----|-------------|-----|----|
|            | Colombia        |    |    | Mexico |    |     | Zambia |     |    | Overall<br>(mandatory sites) |     |    | Gabon          |     |    | Greenland * |     |    |
| Model      | OA              | UA | PA | OA     | UA | PA  | OA     | UA  | PA | OA                           | UA  | PA | OA             | UA  | PA | OA          | UA  | PA |
| A<br>[o+s] | 94              | 81 | 85 | 94     | 85 | 99  | 92     | 99  | 71 | 97                           | 95  | 93 | 99             | 99  | 98 | -           | -   | -  |
| B [o+s]    | 94              | 95 | 71 | 94     | 84 | 98  | 84     | 68  | 75 | 94                           | 85  | 90 | 95             | 100 | 93 | -           | -   | -  |
| C<br>[o+s] | 90              | 98 | 43 | 93     | 84 | 95  | 91     | 97  | 68 | 95                           | 98  | 81 | 91             | 98  | 87 | 89          | 100 | 81 |
| D<br>[o+s] | 91              | 93 | 58 | 93     | 84 | 98  | 92     | 99  | 71 | 96                           | 98  | 85 | 90             | 100 | 85 | -           | -   | -  |
| E [s]      | 93              | 90 | 65 | 93     | 82 | 99  | 77     | 54  | 70 | 90                           | 77  | 88 | 97             | 100 | 96 | -           | -   | -  |
| F [o+s]    | 93              | 76 | 85 | 90     | 86 | 80  | 91     | 96  | 70 | 94                           | 92  | 83 | 98             | 100 | 98 | 94          | 100 | 90 |
| G [s]      | 92              | 94 | 58 | 90     | 87 | 87  | 89     | 86  | 69 | 93                           | 93  | 80 | -              | -   | -  | -           | -   | -  |
| H [o]      | 95              | 98 | 74 | 94     | 85 | 98  | 90     | 100 | 62 | 97                           | 100 | 87 | -              | -   | -  | -           | -   | -  |
| I [o]      | 94              | 95 | 71 | 94     | 85 | 97  | 91     | 100 | 67 | 95                           | 97  | 85 | 82             | 100 | 74 | 95          | 99  | 92 |
| J [s]      | 94              | 87 | 76 | 93     | 83 | 98  | 88     | 82  | 70 | 93                           | 90  | 83 | 98             | 99  | 98 | 89          | 91  | 89 |
| K<br>[o+s] | 92              | 92 | 57 | 88     | 81 | 80  | 85     | 71  | 73 | 91                           | 84  | 77 | -              | -   | -  | -           | -   | -  |
| L [o]      | 92              | 83 | 68 | 91     | 82 | 90  | 75     | 53  | 53 | 89                           | 77  | 78 | 75             | 99  | 69 | 85          | 81  | 98 |
| M [o]      | 90              | 64 | 91 | 88     | 84 | 75  | 93     | 97  | 74 | 93                           | 87  | 85 | 93             | 99  | 91 | 85          | 80  | 98 |
| N<br>[o+s] | 96              | 95 | 84 | 94     | 83 | 100 | 96     | 96  | 87 | 98                           | 97  | 96 | 98             | 100 | 97 | 97          | 97  | 98 |
| O<br>[o+s] | 96              | 89 | 84 | 93     | 84 | 98  | 95     | 97  | 82 | 97                           | 97  | 92 | 95             | 100 | 92 | 96          | 99  | 93 |

\* Excluding the months of January, March, and November.

**Table S2.** Summary of object extraction accuracies. The accuracy metrics are maximum overlap area ( $A_{\max}$ ) and quality ( $A_{\text{qual}}$ ) as a joint balanced measure of correctness ( $A_{\text{cor}}$ ) and completeness ( $A_{\text{com}}$ ). The overall score is the product between  $A_{\max}$  and  $A_{\text{qual}}$ .

|         | Colombia   |                   |      | Mexico     |                   |      | Zambia     |                   |      | Gabon      |                   |      | Greenland  |                   |      |
|---------|------------|-------------------|------|------------|-------------------|------|------------|-------------------|------|------------|-------------------|------|------------|-------------------|------|
| Model   | $A_{\max}$ | $A_{\text{qual}}$ | OA   |
| A [o+s] | 0.64       | 0.43              | 0.27 | 0.73       | 0.50              | 0.37 | 0.77       | 0.57              | 0.43 | 0.81       | 0.66              | 0.53 | -          | -                 | -    |
| B [o+s] | 0.42       | 0.10              | 0.04 | 0.70       | 0.45              | 0.31 | 0.71       | 0.47              | 0.33 | 0.73       | 0.45              | 0.33 | -          | -                 | -    |
| C [o+s] | 0.00       | 0.00              | 0.00 | 0.32       | 0.19              | 0.06 | 0.67       | 0.36              | 0.24 | 0.73       | 0.47              | 0.34 | 0.58       | 0.18              | 0.10 |
| D [o+s] | 0.42       | 0.35              | 0.15 | 0.45       | 0.40              | 0.18 | 0.38       | 0.03              | 0.01 | 0.72       | 0.44              | 0.31 | -          | -                 | -    |
| E [s]   | 0.28       | 0.15              | 0.04 | 0.43       | 0.36              | 0.15 | 0.27       | 0.02              | 0.01 | 0.75       | 0.51              | 0.38 | -          | -                 | -    |
| F [o+s] | 0.49       | 0.33              | 0.16 | 0.64       | 0.39              | 0.25 | 0.79       | 0.61              | 0.48 | 0.80       | 0.64              | 0.50 | 0.75       | 0.52              | 0.38 |
| G [s]   | 0.24       | 0.09              | 0.02 | 0.31       | 0.12              | 0.04 | 0.71       | 0.47              | 0.33 | -          | -                 | -    | -          | -                 | -    |
| H [o]   | 0.54       | 0.36              | 0.19 | 0.46       | 0.41              | 0.19 | 0.68       | 0.37              | 0.25 | -          | -                 | -    | -          | -                 | -    |
| I [o]   | 0.59       | 0.28              | 0.16 | 0.63       | 0.33              | 0.21 | 0.66       | 0.33              | 0.22 | 0.76       | 0.56              | 0.42 | 0.82       | 0.68              | 0.55 |
| J [s]   | 0.19       | 0.11              | 0.02 | 0.43       | 0.37              | 0.16 | 0.73       | 0.55              | 0.40 | 0.79       | 0.63              | 0.49 | 0.75       | 0.55              | 0.41 |
| K [o+s] | 0.38       | 0.27              | 0.10 | 0.33       | 0.24              | 0.08 | 0.55       | 0.29              | 0.16 | -          | -                 | -    | -          | -                 | -    |
| L [o]   | 0.19       | 0.10              | 0.02 | 0.50       | 0.23              | 0.12 | 0.67       | 0.41              | 0.27 | 0.46       | 0.21              | 0.09 | -          | -                 | -    |
| M [o]   | 0.47       | 0.28              | 0.13 | 0.53       | 0.31              | 0.16 | 0.77       | 0.59              | 0.45 | 0.77       | 0.55              | 0.42 | 0.67       | 0.40              | 0.26 |
| N [o+s] | 0.74       | 0.57              | 0.42 | 0.83       | 0.69              | 0.57 | 0.84       | 0.73              | 0.61 | 0.79       | 0.60              | 0.47 | 0.85       | 0.73              | 0.62 |
| O [o+s] | 0.69       | 0.52              | 0.35 | 0.80       | 0.64              | 0.51 | 0.79       | 0.64              | 0.50 | 0.80       | 0.65              | 0.51 | 0.80       | 0.64              | 0.51 |
